# Supplementary material for: Biochemical and genetic analyses of the oomycete Pythium insidiosum provide new insights into clinical identification and urease-based evolution of metabolism-related traits
Source: PeerJ. 2018 Jun 5;6:e4821. doi: 10.7717/peerj.4821 (PMC5993020; doi:10.7717/peerj.4821)
Supplement: Supplemental Information 1 — Information on species, strain, source of genome data, sequence identification number (ID) and gene ID (or position) for retrieving the urease sequence, protein length, and pairwise sequence alignment output (i.e., E-values, identity, and similarity in reference to the urease of P. insidiosum) of each organism is summarized in the table. [file peerj-06-4821-s001.xlsx]

## Sheet: TableS1
	Species	Strain	Public database	Sequence ID	Gene ID / Gene position	Protein length	E-value	Identity (%)	Similarity (%)
	Phytophthora capsici	LT1534	http://genome.jgi.doe.gov	PHYCAscaffold_37	fgenesh2_kg.PHYCAscaffold_37_#_96_#_4098316:1	828	0	78	86
	Phytophthora infestans	T30-4	http://www.broadinstitute.org	1	PITG_00636T0	843	0	78	87
	Phytophthora parasitica	INRA-310	http://www.broadinstitute.org	7000000000000000	PPTG_08132T0	831	0	78	86
	Phytophthora cinnamomi	CBS 144.22	http://fungidb.org	PcinCBS144-22_SC0001	PHYCI_88791	761	0	80	88
	Phytophthora sojae	P6497	http://www.broadinstitute.org	92	Ps_109342T0	843	0	79	86
	Phytophthora ramorum	pr102	http://www.broadinstitute.org	1	Pr_71053T0	843	0	79	87
	Phytopythium vexans	DAOM BR484	http://pythium.plantbiology.msu.edu	pve_contig_151	maker-pve_contig_151-snap-gene-0.28-mRNA-1	830	0	78	86
	Pythium irregulare	DAOM BR486	http://pythium.plantbiology.msu.edu	pir_contig_1132	maker-pir_contig_1132-fgenesh-gene-0.0-mRNA-1	833	0	79	87
	Pythium ultimum	DAOM BR144	http://www.broadinstitute.org	124	Position 128002-130845	891	0	78	84
	Pythium iwayamai	DAOM BR242034	http://pythium.plantbiology.msu.edu	piw_contig_2203	fgenesh_masked-piw_contig_2203-abinit-gene-0.12-mRNA-1	781	0	78	87
	Pythium aphanidermatum	DAOM BR444	http://pythium.plantbiology.msu.edu	pag1_scaffold_88	maker-pag1_scaffold_88-fgenesh-gene-0.0-mRNA-1	1345	0	81	87
	Pythium arrhenomanes	ATCC 12531	http://pythium.plantbiology.msu.edu	par_contig_8	maker-par_contig_8-fgenesh-gene-0.14-mRNA-1	784	0	76	82
	Pythium insidiosum	Pi-S	Accession: BBXB00000000	0092	PINS00920015C	844	0	100	100
	Hyaloperonospora arabidopsis	Emoy2	http://protists.ensembl.org	scaffold_17	HpaG803129	785	0	78	87
	Albugo candida	2VRR	http://fungidb.org	Acan2VRR_SC224	Position 241681-244449	854	0	65	75
	Albugo laibachii	Nc14	http://protists.ensembl.org	FR824053	ALNC14_012060	850	0	73	83
	Aphanomyces astaci	APO3	http://fungidb.org	KI913115	H257_01057	824	0	71	81
	Aphanomyces invadans	NJM9701	http://fungidb.org	KI913952	H310_00423.2	807	0	67	78
	Aphanomyces invadans	NJM9701	http://fungidb.org	KI913952	H310_00423.3	826	0	69	80
	Aphanomyces invadans	NJM9701	http://fungidb.org	KI913952	H310_00423.4	842	0	67	78
	Saprolegnia declina	VS20	http://www.broadinstitute.org	54	SDRG_12932T0	830	0	72	80
	Saprolegnia parasitica	CBS 223.65	http://www.broadinstitute.org	28	SPRG_06801T0	833	0	71	80
	Phaeodactylum tricornutum*	CCAP1055-1	http://genome.jgi-psf.org	chr_18	PHATR_003706	866	0	59	72
	Thalassiosira pseudonana*	CCMP1335	http://genome.jgi-psf.org	chr_16a	THAPS_003283	795	0	59	72
